# Supplementary material for: Loss of the Nuclear Envelope Protein LAP1B Disrupts the Myogenic Differentiation of Patient-Derived Fibroblasts
Source: MDPI journal article supplement (doi:10.3390/ijms232113615), 2022-11-06
Supplement: s1 [file s1]

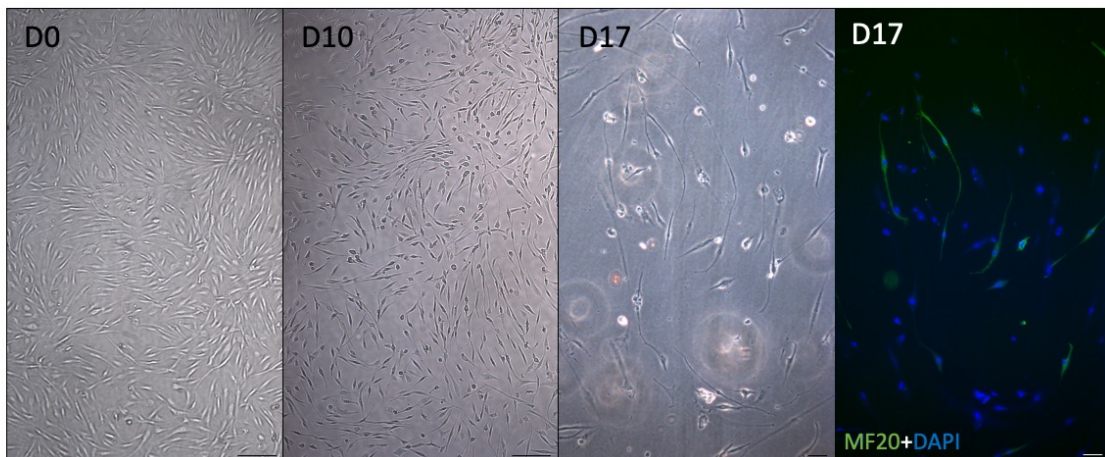

**Figure S1. Long-term differentiation of LAP1B-deficient fibroblasts.** Phase contrast images of LAP1B-deficient fibroblasts at day 0 (D0) and day 10 (D10) after culture in Dox-supplemented differentiation medium. Cells were fixed and stained at day 17 (D17) with MF20 for myosin heavy chain and DAPI for nuclei. Scale bar: 20  $\mu\text{m}$ .

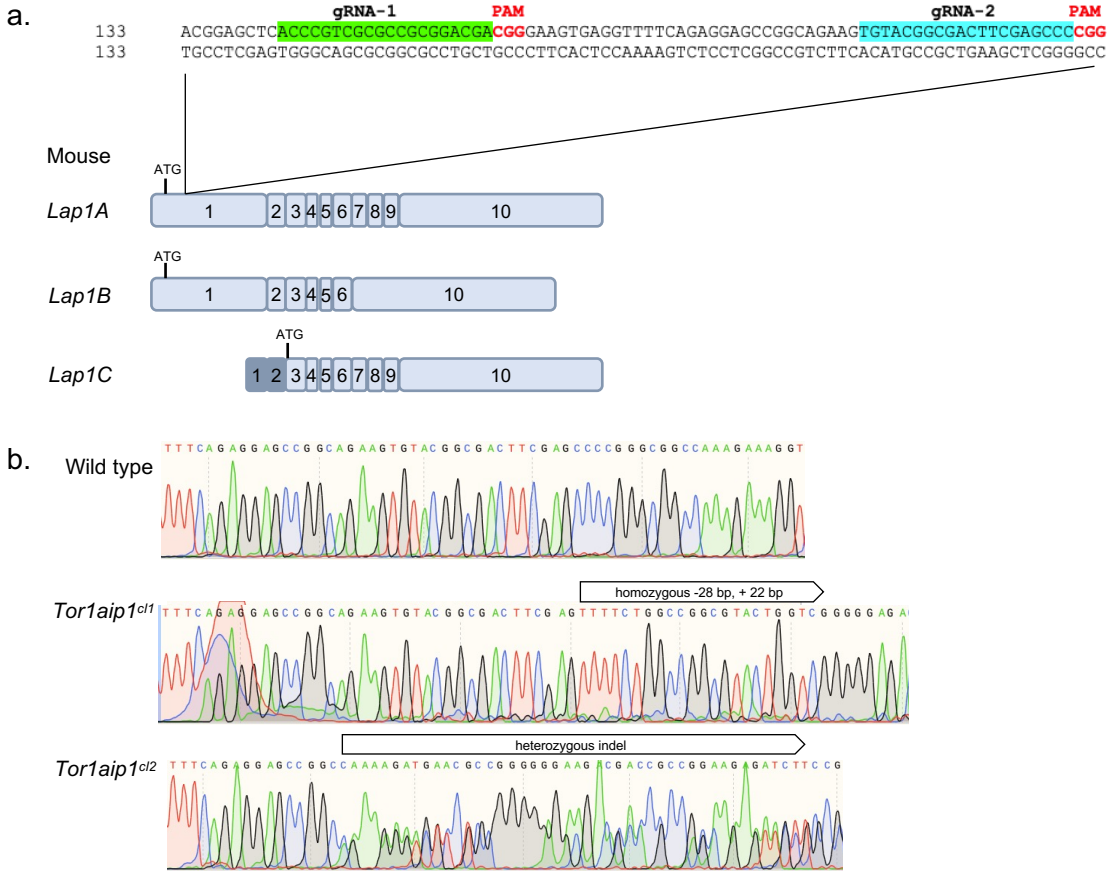

**Figure S2. Generation of *Tor1aip1*-mutant C2C12 myoblast lines.** (a) Schematic representation of mouse *Lap1* transcripts. Each box is numbered according to the corresponding exon in mouse *Tor1aip1*. Position of the start codon is indicated for each transcript. In *Lap1C* transcript, grey boxes represent exonic sequences that are transcribed as UTRs. Positions of gRNAs targeting exon 1 of *Lap1A* and *Lap1B* are highlighted in green and turquoise, with PAM sequence in red. (b) Chromatograms of showing mutations in exon 1 of *Tor1aip1* in mutant clone 1 (*Tor1aip1<sup>cl1</sup>*) and clone 2 (*Tor1aip1<sup>cl2</sup>*). Wild type sequence is shown in upper panel.

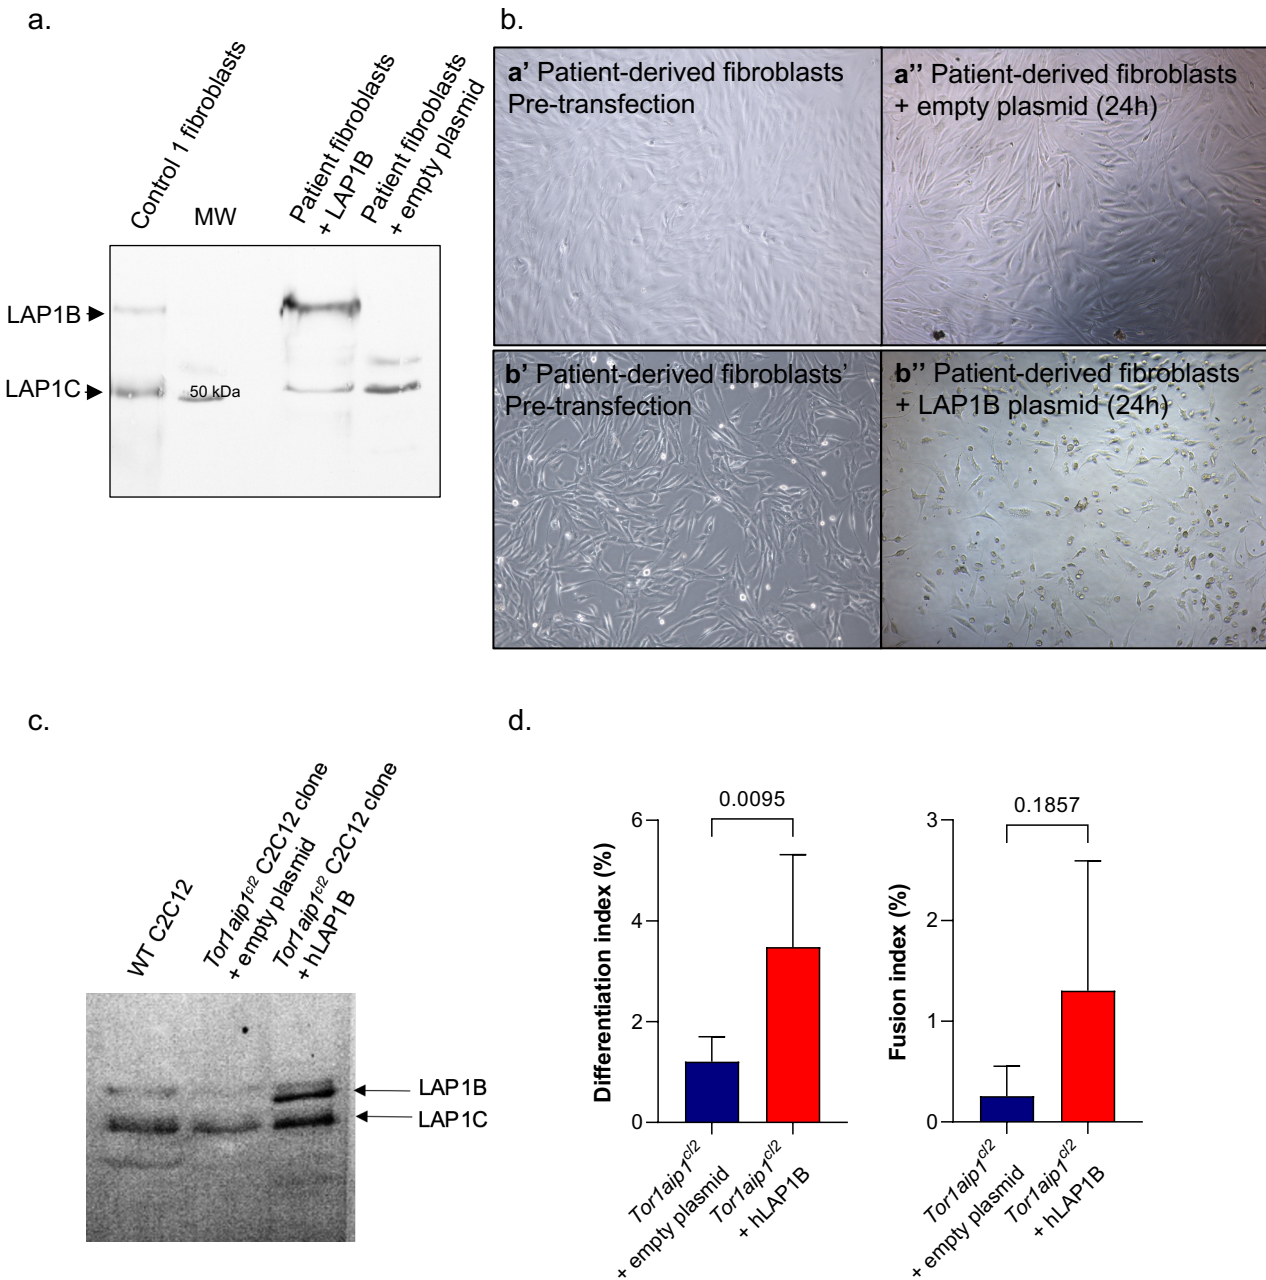

**Figure S3. Rescue experiments.** (a) Protein expression of LAP1 isoforms in control fibroblasts, patient-derived fibroblasts transfected with pcDNA3.1-hLAP1B, and patient-derived fibroblasts transfected with the empty vector. Membrane incubated with anti-TOR1AIP1 antibody (1:2000, Cat. No. HPA047151, Sigma-Aldrich). MW, molecular weight marker. (b) Brightfield images of patient-derived fibroblasts before (a') and 24 h after transfection (a'') of the empty plasmid, as well as before (b') and 24 h after transfection (b'') of pcDNA3.1-hLAP1B. (c) Protein expression of LAP1 isoforms in WT C2C12 myoblasts, *Tor1aip1<sup>cl2</sup>* mutant clone transfected with the empty plasmid, and *Tor1aip1<sup>cl2</sup>* mutant clone transfected with pcDNA3.1-hLAP1B. Membrane incubated with anti-LAP1 antibody (1:2500, a kind gift from Dr. William T. Dauer). (d) Differentiation and fusion indices at day 5 of *Tor1aip1<sup>cl2</sup>* clone transfected with the empty plasmid, and *Tor1aip1<sup>cl2</sup>* clone transfected with pcDNA3.1-hLAP1B. n=5, P values determined by Mann-Whitney U test.

a.

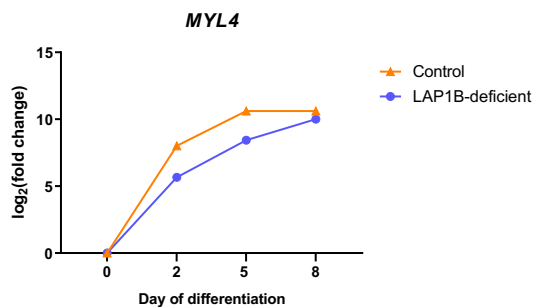

b.

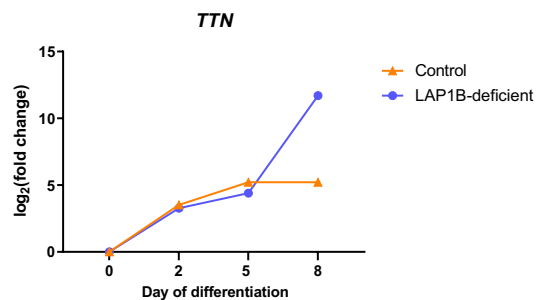

c.

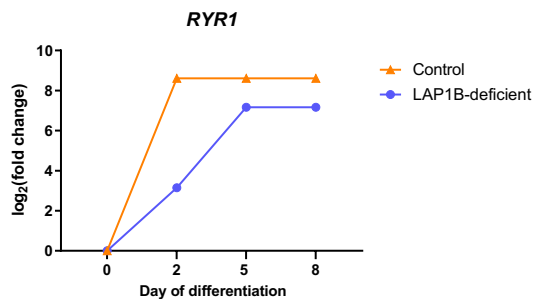

d.

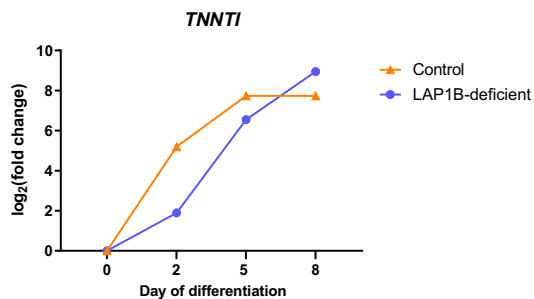

**Figure S4. RNA expression pattern of additional muscle-specific genes by RNA-Seq.** RNA expression fold changes of (a) *MYL4*, (f) *TTN*, (g) *RYR1* and (h) *TNNT1* throughout differentiation determined by RNA-Seq.

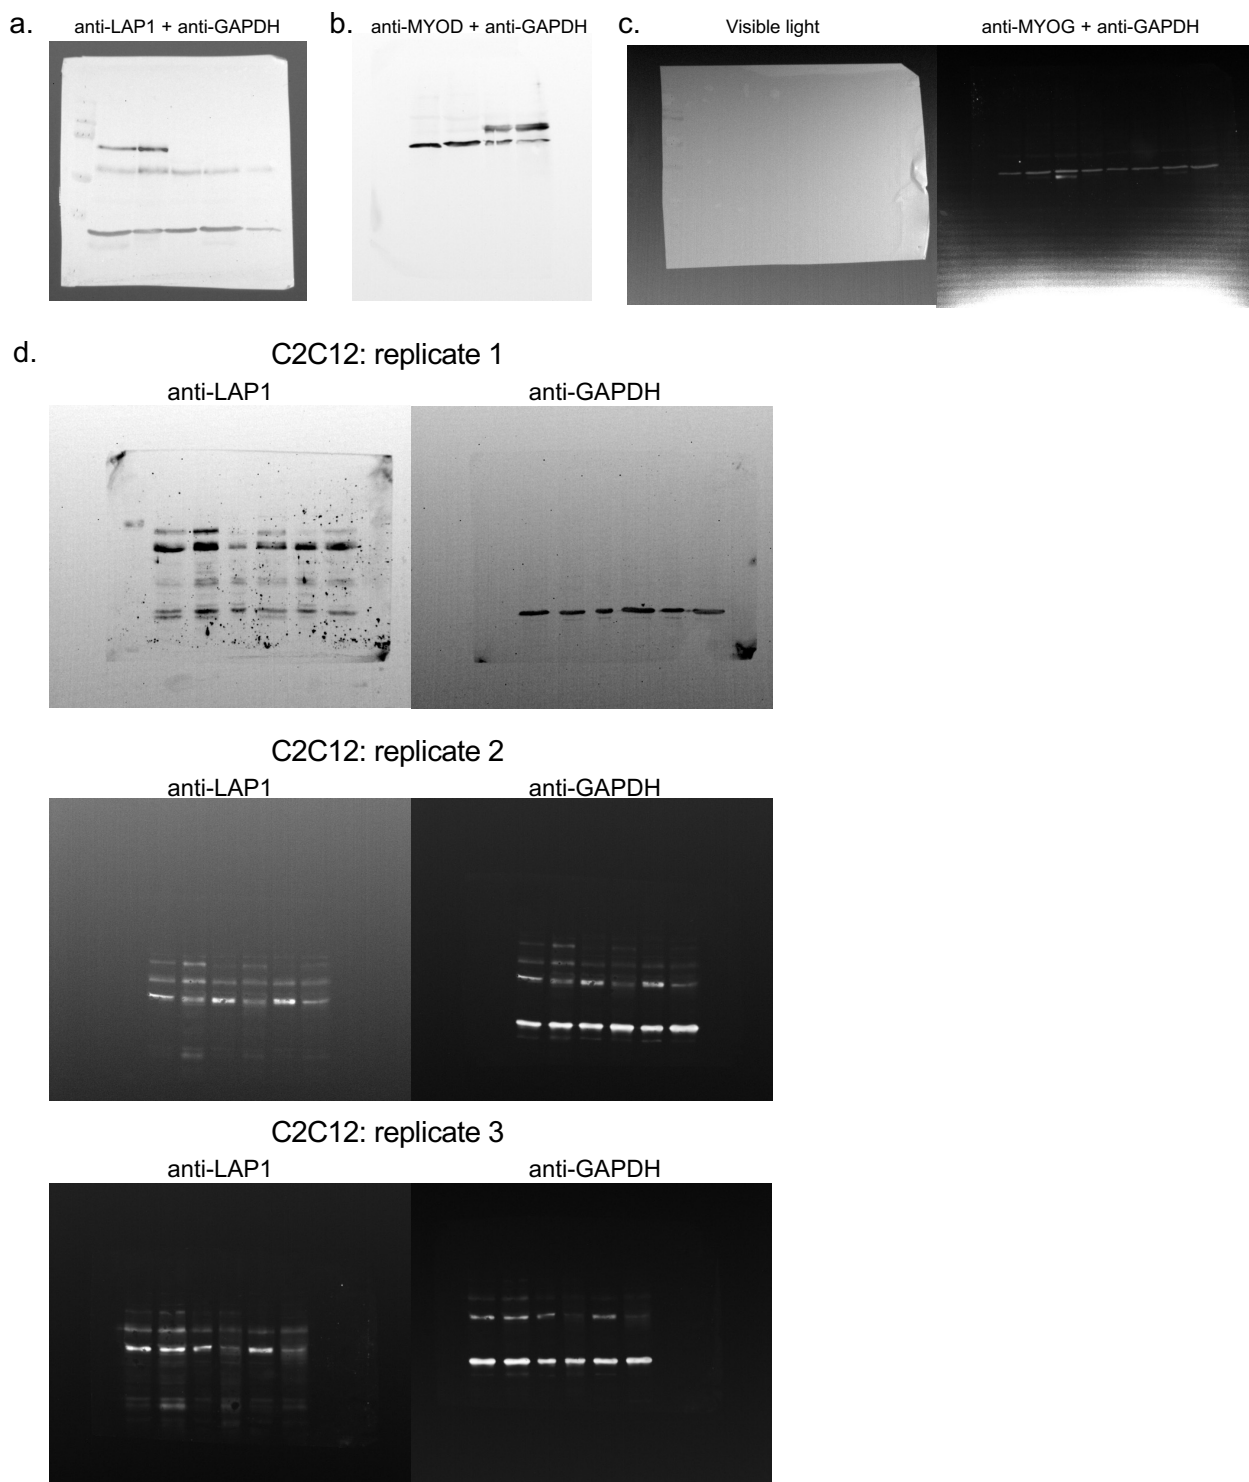

**Figure S5. Uncropped blot pictures.** (a) Membrane in Figure 1a, incubated with anti-TOR1AIP1 antibody (1:2000, Cat. No. HPA047151, Sigma-Aldrich) and anti-GAPDH antibody (1:5000, Cat. No. G8795, Sigma-Aldrich). (b) Membrane in Figure 1d, incubated with anti-MyoD1 antibody (1:500, Cat. No. MA1-41017, Invitrogen) and anti-GAPDH antibody (1:5000, Cat. No. G8795, Sigma-Aldrich). (c) Membrane in Figure 5d, incubated with anti-myogenin (1:200, Cat. No. sc-1273, Santa Cruz ) and anti-GAPDH antibody (1:5000, Cat. No. G8795, Sigma-Aldrich). (d) Membranes in Figure 3a, each membrane has been incubated first with anti-LAP1 antibody (1:2500, a kind gift from Dr. William T. Dauer) and photographed, then stripped and incubated with anti-GAPDH antibody (1:5000, Cat. No. G8795, Sigma-Aldrich).

**Table S1.** Primer sequences used in qPCR.

| Gene          | Forward primer sequence     | Reverse primer sequence       |
|---------------|-----------------------------|-------------------------------|
| <i>GAPDH</i>  | 5'GGTCACCAGGGCTGCTTTTA 3'   | 5'TTCCCGTTCTCAGCCTTGAC 3'     |
| <i>CDKN1A</i> | 5'AGGTGGACCTGGAGACTCTCAG 3' | 5'TCCTCTTGGAGAAGATCAGCCG 3'   |
| <i>PTGS2</i>  | 5'GTACTCCCGATTGAAGCCCC 3'   | 5'AAGCCTAATGTGGGGACAGC 3'     |
| <i>ANKRD1</i> | 5'GAAAAGCGAGAAACAACGAGA 3'  | 5'GGTTCCTTTACAACCTGGAAC TT 3' |
| <i>MYOG</i>   | 5'AAACTACCTGCCTGTCCACC 3'   | 5'ACGGACACCGACTTCCTCTT 3'     |
